# Supplementary material for: Transcriptome Profiling, Physiological and Biochemical Analyses Reveal Comprehensive Insights in Cadmium Stress in Brassica carinata L
Source: MDPI journal article supplement (doi:10.3390/ijms25021260), 2024-01-19
Supplement: s1 [file s1 › Supplementary Figures.pdf]

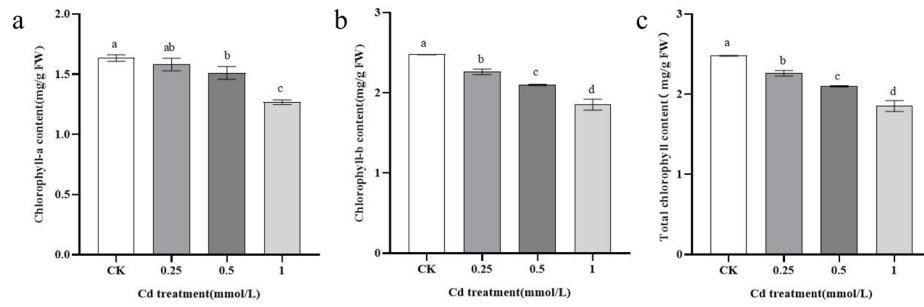

**Figure S1. Chlorophyll content changes in *B. carinata* seedlings under different concentrations of Cd treatment.** a: Chlorophyll a content. b: Chlorophyll b content. c: Total chlorophyll content. Different letter represents the statistically different group determined by LSD method ( $P < 0.05$ ). The error bar in chart indicates SE, and three replicates ( $n=3$ ) per sample are prepared.

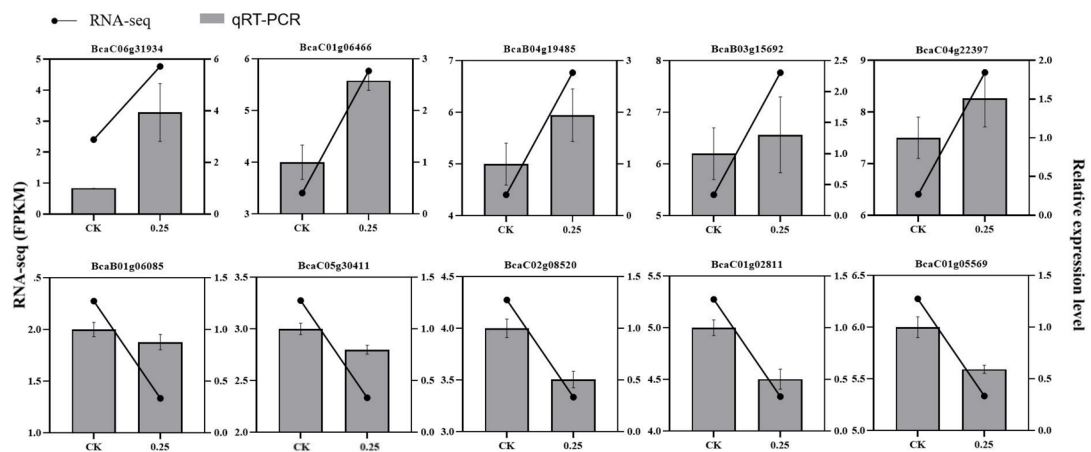

**Figure S2. Validation of RNA-seq using qRT-PCR.** The average FPKM value (black dot) and relative expression level (box) are shown in the figure. The error bar in chart indicates SE, and three replicates ( $n=3$ ) per sample are prepared.

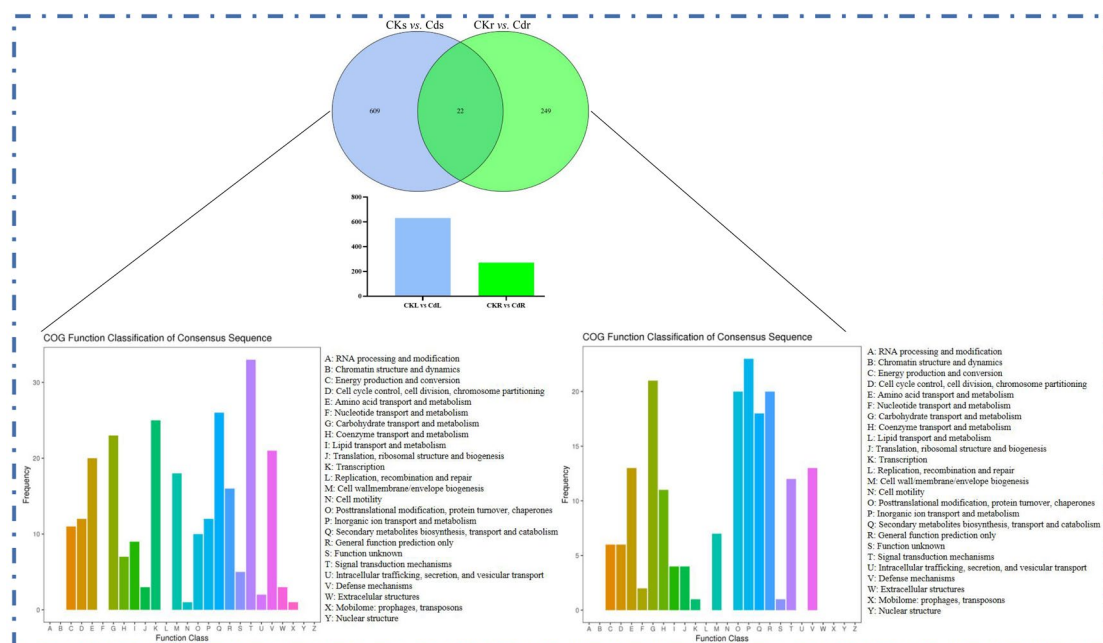

**Figure S3.** Venn diagrams and COG enrichment analysis of the DEGs in CKs vs. Cds and CKr vs. Cdr.

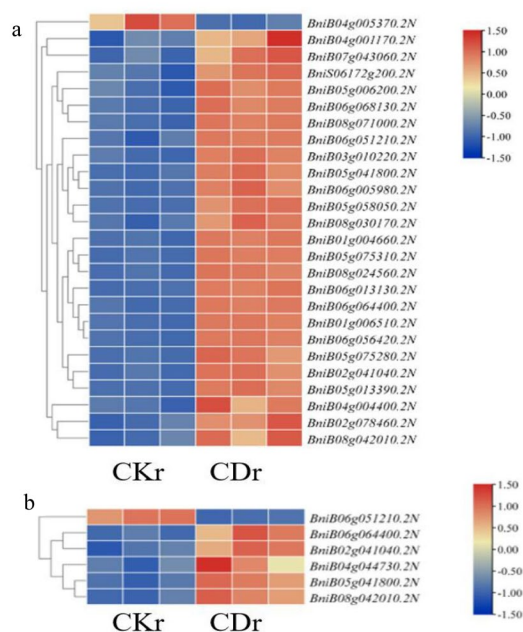

**Figure S4.** Clusters of differentially expressed *WRKY* genes in shoots and roots under Cd stress.
