# Supplementary material for: Transcriptome Profiling, Physiological and Biochemical Analyses Reveal Comprehensive Insights in Cadmium Stress in Brassica carinata L
Source: MDPI journal article supplement (doi:10.3390/ijms25021260), 2024-01-19
Supplement: s1 [file s1 › Supplementary Tables.pdf]

**Table S1.** Cadmium content of heavy metal after three days of treatment

| <b>Description of sample</b> | <b>Cadmium content (mg/kg)</b> |
|------------------------------|--------------------------------|
|                              | 12.732                         |
| 0 mM Shoots                  | 12.414                         |
|                              | 13.242                         |
|                              | 196.685                        |
| 0.25 mM Shoots               | 204.854                        |
|                              | 209.233                        |
|                              | 233.790                        |
| 0.5 mM Shoots                | 233.708                        |
|                              | 234.150                        |
|                              | 272.160                        |
| 1 mM Shoots                  | 265.322                        |
|                              | 270.273                        |
|                              | 50.618                         |
| 0 mM Roots                   | 46.077                         |
|                              | 51.047                         |
|                              | 766.880                        |
| 0.25 mM Roots                | 764.232                        |
|                              | 829.865                        |
|                              | 1109.064                       |
| 0.5 mM Roots                 | 1049.091                       |
|                              | 1037.719                       |
|                              | 1318.424                       |
| 1 mM Roots                   | 1222.559                       |
|                              | 1285.277                       |
|                              | 0.0008                         |
| 0 mM Seeds                   | 0.0006                         |
|                              | 0.0006                         |
|                              | 0.001                          |
| 0.25 mM Seeds                | 0.0009                         |
|                              | 0.0012                         |

**Table S2.** Primers used in experiment of gene expression by qRT-PCR

| Gene id      | Forward primer        | Reverse primer       |
|--------------|-----------------------|----------------------|
| <i>actin</i> | TTCAATGTCCCTGCCATGTA  | GAGACGGAGGATAGCGTGAG |
| BcaC06g31934 | CTCTCTCGTGTAATTCCTTCG | CAGTGTTGCAAACCTTCCAA |
| BcaC01g06466 | TGTATCAGTGGGAGTTGCGG  | ATCAACGCTAATGCGGTCCA |
| BcaB04g19485 | CGACCAAACAGGAGATGGGT  | CCCATCCATCATCTCCCACG |
| BcaB03g15692 | GCGTGGAGAAGGGTTGATGA  | CCTCGTTAGCCACAAGCAGA |
| BcaC04g22397 | TTCAGACGGGAGACTTTGGC  | CGCGAGTGTTCTCCAGCTAT |
| BcaB01g06085 | GCTTGGTGCATTGGTTCTGG  | GCGGCAGCTTTTATCACGAC |
| BcaC05g30411 | CTTGTTTTGGGAAGCCGTGG  | ATCGGCATTGCGTTTGATCG |
| BcaC02g08520 | CTACTCTGTTCGTGCAGCCA  | TCTTGCACATGCTTCCACCA |
| BcaC01g02811 | GACGGATAAAGGACGGCGAT  | GGAAACGACGAAAGGCACAC |
| BcaC01g05569 | ACTAGACTGGGGAGGCTACG  | TCCGTGTGGTCACGAAGTTT |

**Table S3.** Fatty acids and oil content

| Description of sample | Oleic acid(%) | Linoleic acid(%) | linolenic acid(%) | Erucic acid(%) | Total oil content(%) | Glucosinolates(%) |
|-----------------------|---------------|------------------|-------------------|----------------|----------------------|-------------------|
| CK1                   | 63.74         | 18.91            | 8.49              | 0.38           | 50.05                | 10.02             |
| CK2                   | 61.32         | 21.00            | 9.35              | 0.36           | 51.36                | 12.62             |
| CK3                   | 62.78         | 19.61            | 8.79              | 0.36           | 47.64                | 10.44             |
| 0.25 mM Cd            | 58.35         | 17.53            | 8.09              | 0.39           | 50.36                | 15.26             |
| 0.25 mM Cd            | 59.93         | 18.57            | 7.09              | 0.40           | 48.01                | 14.46             |
| 0.25 mM Cd            | 59.18         | 17.76            | 7.01              | 0.40           | 47.00                | 14.08             |
